# Supplementary material for: [VIV15SbIII6O42]6–: An antimony analogue of the molecular magnet [V15As6O42(H2O)]6–
Source: Royal Society of Chemistry journal article supplement (doi:10.1039/b708744f), 2007-01-01
Supplement: b708744f.pdf [file b708744f.pdf]

**$[\text{V}^{\text{IV}}_{15}\text{Sb}^{\text{III}}_6\text{O}_{42}]^{6-}$ : An Antimony Analogue of the Molecular Magnet  $[\text{V}_{15}\text{As}_6\text{O}_{42}(\text{H}_2\text{O})]^{6-}$**   
(R. Kiebach, C. Näther, P. Kögerler and W. Bensch)  
Supplementary Information

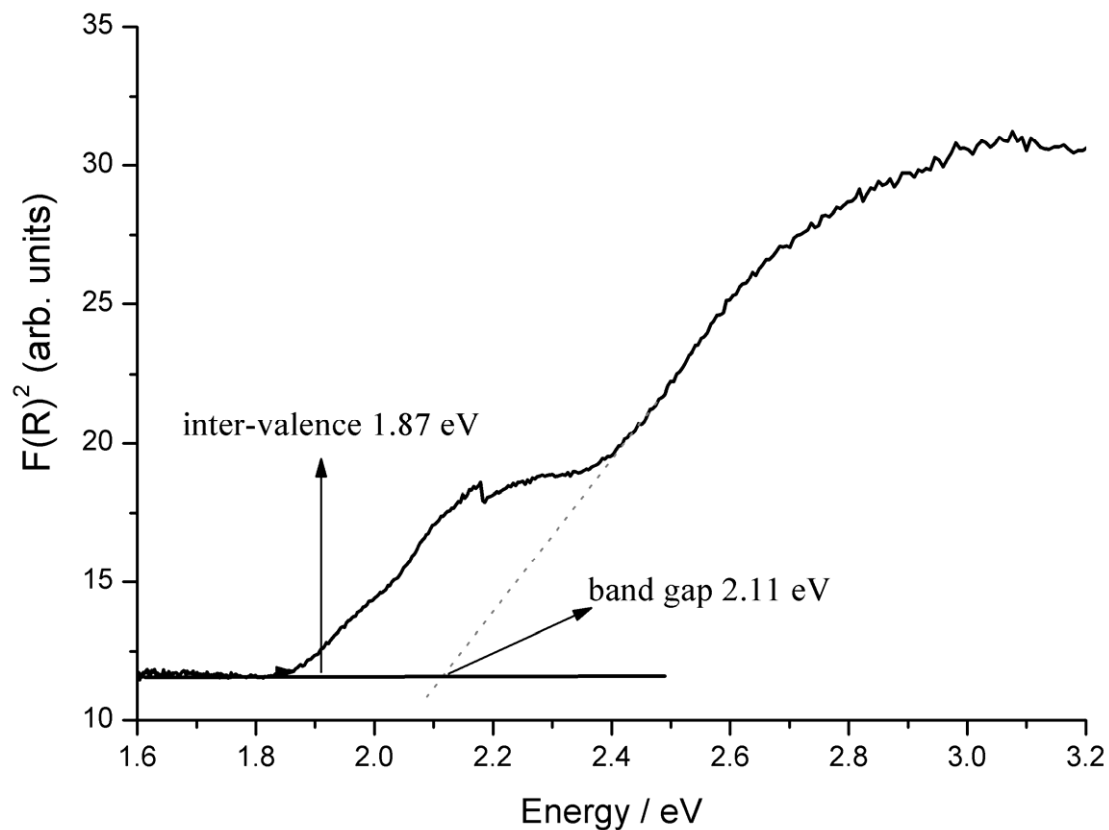

Fig. S1: Transformed UV-Vis spectrum.

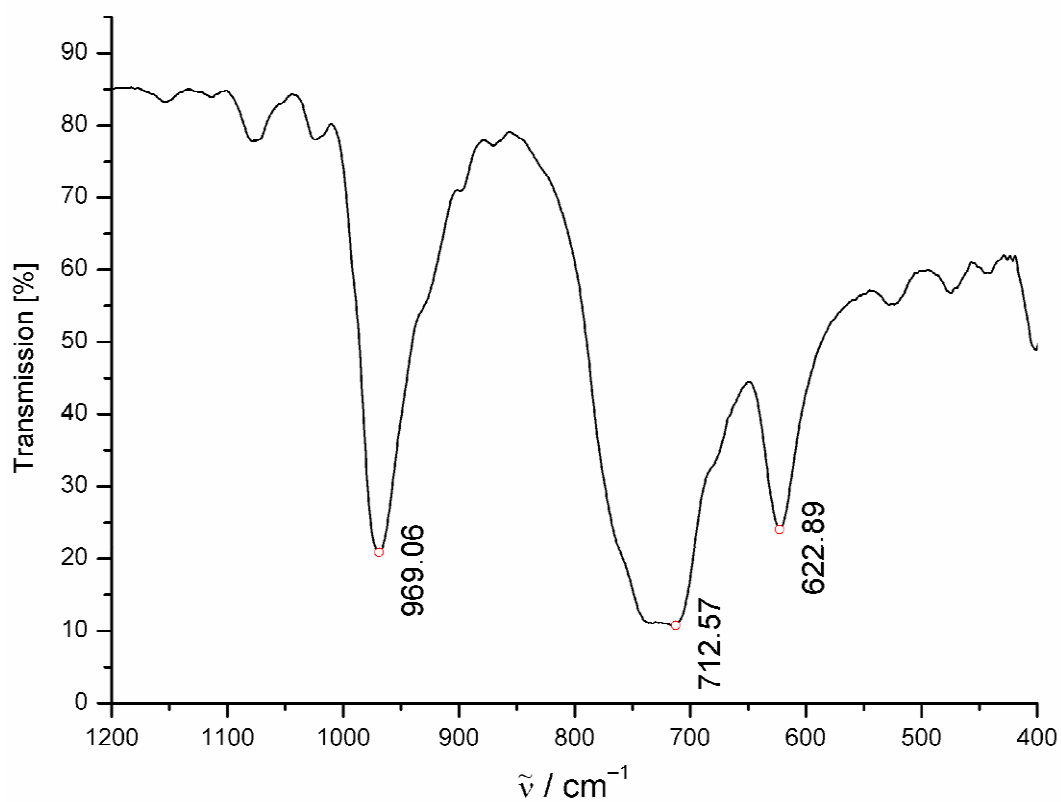

Fig. S2: IR spectrum (KBr pellet).

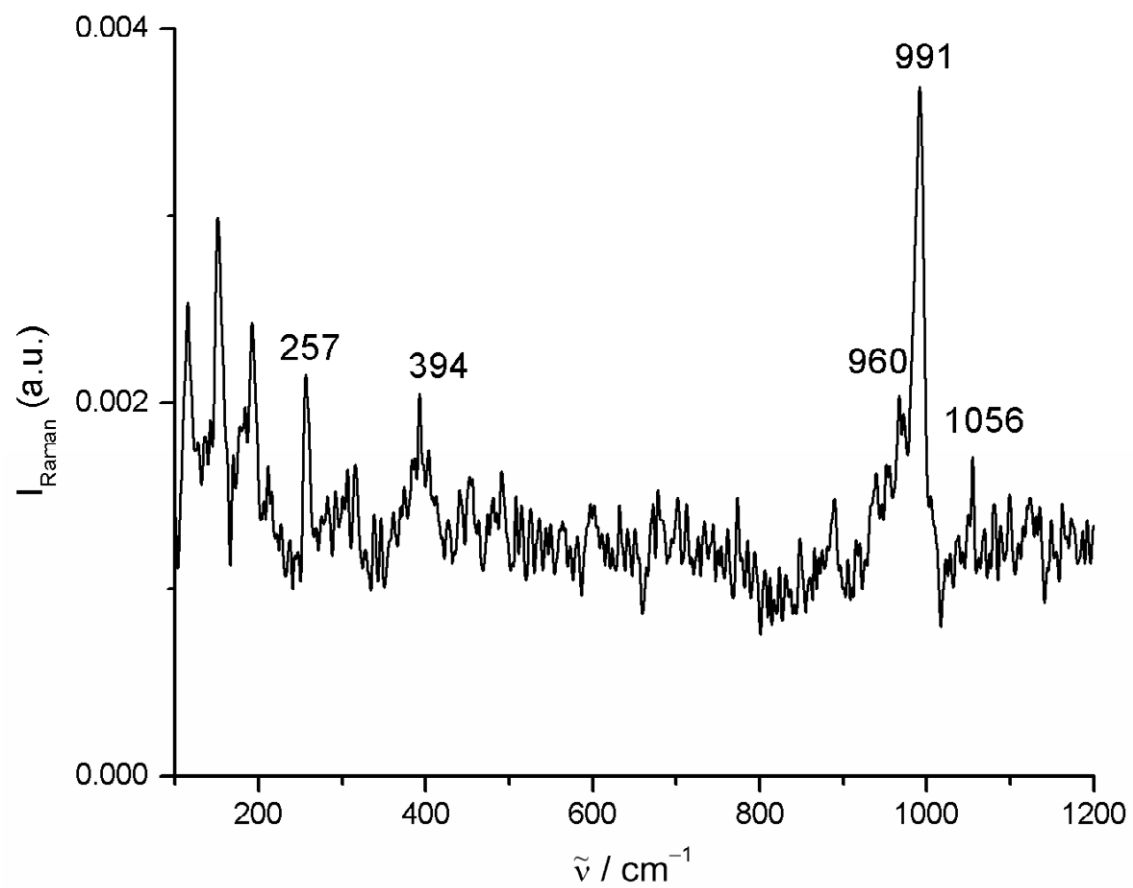

Fig. S3: Raman spectrum ( $\lambda_e = 1064 \text{ nm}$ )

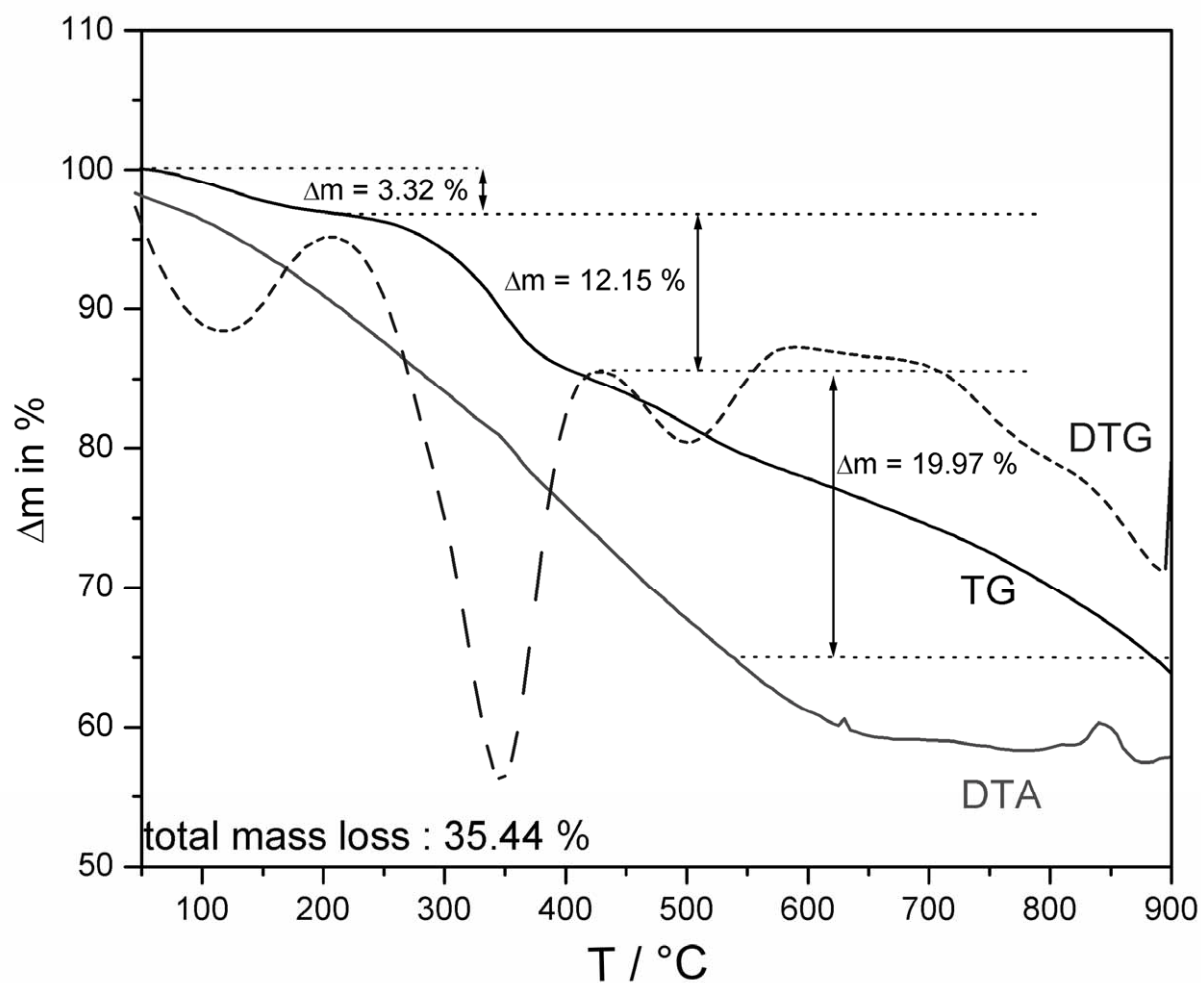

Fig. S4: Representative DTA-TG curves (heating rate: 4 K/min).

BVS values:

- V1: 4.058
- V2: 4.041
- V3: 4.059
- V4: 3.998
- V5: 4.02
- V6: 3.923
- V7: 4.04
- V8: 3.949
- V9: 4.038
- V10: 3.591
- V11: 3.957
- V12: 4.021
- V13: 4.118
- V14: 3.953
- V15: 4.012
